# Supplementary material for: Association of serum total 25-hydroxy-vitamin D concentration and risk of all-cause, cardiovascular and malignancies-specific mortality in patients with hyperlipidemia in the United States
Source: Frontiers journal article supplement (doi:10.3389/fnut.2022.971720), 2022-10-20
Supplement: Table_1.XLS [file Table_1.XLS]

## Sheet: Table1
		Serum 25(OH)VD (ng/mL)
		Total	<17.3	17.3-23.1	23.2-28.2	28.3-35.0	>35.0	p-value
	Number of cases	6740	1343 (19.9)	1353 (20.0)	1352 (20.1)	1344 (19.9)	1348 (20.0)
	Age	53.1 (0.2)	48.3 (0.4)	49.5 (0.4)	52.4 (0.4)	55.0 (0.4)	60.6 (0.4)
	20 - 40	1787 (26.5)	481 (35.8)	463 (34.2)	362 (26.8)	299 (22.3)	182 (13.5)	<0.01
	41 - 60	2482 (36.8)	513 (38.2)	515 (38.1)	517 (38.2)	507 (37.7)	430 (31.9)
	> 61	2471 (36.7)	349 (26.0)	375 (27.7)	473 (35.0)	538 (40.0)	736 (54.6)
	Gender
	Female	3994 (53.0)	808 (53.8)	772 (51.3)	729 (48.1)	756 (50.2)	929 (61.8)	<0.01
	Male	3539 (47.0)	695 (46.2)	732 (48.7)	788 (51.9)	749 (49.8)	575 (38.2)
	Race/ethnicity
	Non-Hispanic White	3119 (46.3)	296 (22.0)	453 (33.5)	623 (46.1)	817 (60.8)	930 (69.0)	<0.01
	Non-Hispanic Black	1192 (17.7)	504 (37.5)	257 (19.0)	189 (14.0)	121 (9.0)	121 (9.0)
	Mexican American	1017 (15.1)	279 (20.8)	280 (28.2)	233 (17.2)	146 (10.9)	79 (5.9)
	Others1	1412 (21.0)	264 (19.7)	363 (26.8)	307 (22.7)	260 (19.4)	218 (16.2)
	BMI	30.0 (0.2)	32.1 (0.3)	30.9 (0.2)	29.7 (0.2)	29.3 (0.2)	28.1 （0.2）
	< 25.0	1544 (22.9)	234 (17.4)	220 (16.3)	307 (22.7)	344 (25.6)	439 (32.6)	<0.01
	25.0-29.9	2297 (34.1)	373 (27.8)	478 (35.3)	461 (34.1)	488 (36.3)	497 (36.9)
	≥30.0	2899 (43.0)	736 (54.8)	655 (48.4)	584 (43.2)	512 (38.1)	412 (30.6)
	CCI	1.2 (1.4)	1.1 (1.4)	1.2 (1.3)	1.3 (1.3)	1.6 (1.1)	1.3 (1.3)
	0	3046 (45.2)	685 (51.0)	684 (50.5)	630 (46.6)	591 (44.0)	456 (33.8)	<0.01
	1	1465 (21.7)	258 (19.2)	309 (22.8)	284 (21.0)	288 (21.4)	326 (24.2)
	2	909 (13.5)	172 (12.8)	159 (11.8)	189 (14.0)	182 (13.5)	207 (15.4)
	≥3	1320 (19.6)	228 (17.0)	201 (14.9)	249 (18.4)	283 (21.1)	359 (26.6)
	HDL (mg/dL)	52.4 (0.2)	50.1 (0.4)	49.3 (0.4)	50.6 (0.4)	53.6 (0.5)	58.4 (0.5)	<0.01
	LDL (mg/dL)	121.8 (0.5)	123.6 (1.0)	123.0 (1.0)	121.9 (1.0)	121.3 (1.0)	119.2 (1.0)	<0.01
	TG (mg/dL)	133.1 (0.8)	133.1 (1.9)	134.3 (1.9)	135.7 (1.8)	133.5 (1.8)	129.1 (1.7)	<0.01
	TC (mg/dL)	200.8 (0.5)	200.2 (1.2)	199.3 (1.2)	199.6 (1.2)	201.6 (1.2)	203.4 (1.2)	<0.01
	Healthy eatig index	54.5 (0.2)	50.9 (0.3)	53.4 (0.2)	54.8 (0.2)	55.7 (0.2)	57.6 (0.2)
	<50.0	2613 (38.8)	659 (49.1)	557 (41.2)	510 (37.7)	484 (36.0)	403 (29.9)	<0.01
	50.0-79.9	3899 (57.9)	661 (49.2)	759 (56.1)	794 (58.7)	811 (60.3)	874 (64.8)
	≥80.0	228 (3.4)	23 (1.7)	37 (2.7)	48 (3.6)	49 (3.7)	71 (5.3)
	Vitamin D intake (μg/d)	4.7 (1.0)	3.6 (0.9)	4.5 (1.0)	5.1 (0.9)	5.2 (1.0)	5.0 (0.9)
	Median	3.6	2.7	3.4	4	4	3.8
	<10	6146 (91.2)	1289 (96.0)	1246 (92.1)	1203 (89.0)	1193 (88.8)	1215 (90.1)	<0.01
	10-15	384 (5.7)	34 (2.5)	71 (5.3)	98 (7.3)	102 (7.6)	79 (5.9)
	>15	210 (3.1)	20 (1.5)	36 (2.7)	51 (3.8)	49 (3.7)	54 (4.0)
	Medication usage							<0.01
	No	2378 (35.3)	633 (47.1)	589 (43.5)	512 (37.9)	398 (29.6)	246 (18.3)
	hypolipidemic medications	2010 (29.8)	291 (21.7)	310 (22.9)	383 (28.3)	449 (33.4)	577 (42.8)
	Others2	2352 (34.9)	419 (31.2)	454 (33.6)	457 (33.8)	497 (37.0)	525 (39.0)
	Outcomes							<0.01
	Alive	5988 (88.8)	1189 (88.5)	1226 (90.6)	1201 (88.8)	1200 (89.3)	1172 (86.9)
	Cardiovascular mortality	315 (4.7)	68 (5.1)	62 (4.6)	71 (5.3)	52 (3.9)	62 (4.6)
	Malignancies-specified mortality	235 (3.5)	53 (4.0)	32 (2.4)	48 (3.6)	48 (3.6)	54 (4.0)
	Other causes	202 (3.0)	33 (2.5)	33 (2.4)	32 (2.4)	44 (3.3)	60 (4.5)
	Length of follow-up							<0.01
	7-12 years	4206 (62.4)	872 (64.9)	867 (64.1)	882 (65.2)	840 (62.5)	745 (17.7)
	3-6 years	2534 (37.6)	471 (35.1)	486 (35.9)	470 (34.8)	504 (37.5)	603 (23.8)
	Measurment data were recorded as means (SE) and count data were numbers (percentage); 1, Other races indicated Multi-Racial population and Hispanics; 2, indicated drugs except hypolipidemic medications; Abbreviations: CCI, Charlson Comorbidity Index; HEI, healthy eating index; BMI, body mass index; TC, total cholesterol; TG, triglyceride; HDL-C, high-density lipoprotein-cholesterol; LDL-C, low-de…

## Sheet: Table 2
	Serum 25(OH)VD	Male	Age	Non-Hispanic White	Non-Hispanic Black	Mexican American	Other races1	CCI	BMI	hypolipidemic medication usage	HEI	HDL-C	LDL-C	TG	TC	Length of follow-up
Serum 25(OH)VD	1	-0.0464256	0.259448	0.352984	-0.262727	-0.155889	-0.0490482	0.113747	-0.202995	0.152662	0.137272	0.21187	-0.0327307	-0.0266736	0.0446452	0.065358
Male	-0.0464256	1	-0.000735881	0.0233713	-0.0351509	-0.00310736	0.00705431	0.00947564	-0.0768367	-0.127334	-0.0985673	-0.290425	-0.0302615	0.108935	-0.103422	-0.00669196
Age	0.259448	-0.000735881	1	0.186801	-0.0377797	-0.127712	-0.0811222	0.431474	-0.0722492	0.264868	0.178796	0.188866	-0.12914	-0.0305242	-0.0486626	0.0309587
Non-Hispanic White	0.352984	0.0233713	0.186801	1	-0.430193	-0.391239	-0.477781	0.13705	-0.0413787	0.158961	-0.0597594	0.0202749	-0.0524222	0.0413357	-0.0244322	-0.0415488
Non-Hispanic Black	-0.262727	-0.0351509	-0.0377797	-0.430193	1	-0.195397	-0.238619	-0.0273083	0.140901	0.0225816	-0.0301481	0.0787617	0.0308264	-0.187334	-0.00240807	0.0135278
Mexican American	-0.155889	-0.00310736	-0.127712	-0.391239	-0.195397	1	-0.217012	-0.0755038	0.0488958	-0.139231	-0.00542702	-0.0803497	0.00858041	0.0908362	0.00538947	-0.0294001
Other races1	-0.0490482	0.00705431	-0.0811222	-0.477781	-0.238619	-0.217012	1	-0.075905	-0.124414	-0.0934734	0.106259	-0.0280133	0.0277807	0.045096	0.0274527	0.0640837
CCI	0.113747	0.00947564	0.431474	0.13705	-0.0273083	-0.0755038	-0.075905	1	0.118454	0.276456	0.00845244	-0.0297212	-0.17453	0.0617853	-0.142864	0.0361462
BMI	-0.202995	-0.0768367	-0.0722492	-0.0413787	0.140901	0.0488958	-0.124414	0.118454	1	0.0644339	-0.112448	-0.256607	-0.041811	0.127016	-0.0946378	0.0276751
hypolipidemic medication usage	0.152662	-0.127334	0.264868	0.158961	0.0225816	-0.139231	-0.0934734	0.276456	0.0644339	1	0.0347496	0.0790249	-0.00862489	0.0325541	0.033172	0.00437758
HEI	0.137272	-0.0985673	0.178796	-0.0597594	-0.0301481	-0.00542702	0.106259	0.00845244	-0.112448	0.0347496	1	0.141138	-0.0230207	-0.0608709	0.0150397	-0.0266054
HDL-C	0.21187	-0.290425	0.188866	0.0202749	0.0787617	-0.0803497	-0.0280133	-0.0297212	-0.256607	0.0790249	0.141138	1	0.113286	-0.394062	0.357741	0.0123116
LDL-C	-0.0327307	-0.0302615	-0.12914	-0.0524222	0.0308264	0.00858041	0.0277807	-0.17453	-0.041811	-0.00862489	-0.0230207	0.113286	1	0.0458215	0.922532	-0.0433506
TG	-0.0266736	0.108935	-0.0305242	0.0413357	-0.187334	0.0908362	0.045096	0.0617853	0.127016	0.0325541	-0.0608709	-0.394062	0.0458215	1	0.204811	-0.105746
TC	0.0446452	-0.103422	-0.0486626	-0.0244322	-0.00240807	0.00538947	0.0274527	-0.142864	-0.0946378	0.033172	0.0150397	0.357741	0.922532	0.204811	1	-0.0537344
Length of follow-up	0.065358	-0.00669196	0.0309587	-0.0415488	0.0135278	-0.0294001	0.0640837	0.0361462	0.0276751	0.00437758	-0.0266054	0.0123116	-0.0433506	-0.105746	-0.0537344	1
The correlations among continuous variables were calculated the Pearson correlation coefficients and categorical variables were calculated the Spearman correlation coefficients; 1, Other races indicated Multi-Racial population and Hispanics; Bold font means p<0.05; Abbreviations: CCI, Charlson Comorbidity Index; HEI, healthy eating index; BMI, body mass index; TC, total cholesterol; TG, triglycer…

## Sheet: Table3
			Serum 25(OH)VD (ng/mL)
		>35.0	<17.3	17.3-23.1	23.2-28.2	28.3-35.0
	All-cause mortality
	Model 1a	1	2.18 (1.62 - 2.95)	1.70 (1.28 - 2.25)	1.25 (0.96 - 1.63)	0.98 (0.75 -1.28)
	Model 2b	1	2.06 (1.51 - 2.82)	1.65 (1.22 - 2.22)	1.19 (0.91 - 1.56)	0.95 (0.72 - 1.25)
	Cardiovascular mortality
	Model 1a	1	2.92 (1.77 - 4.84)	1.26 (0.72 - 2.22)	1.43 (0.91 - 2.25)	1.14 (0.72 - 1.81)
	Model 2b	1	2.52 (1.49 - 4.26)	1.18 (0.67 - 2.10)	1.31 (0.82 - 2.10)	1.07 (0.67 - 1.71)
	Model 3c	1	2.54 (1.50 - 4.24)	1.09 (0.61 - 1.94)	1.32 (0.82 - 2.12)	1.11 (0.69 - 1.78)
	Malignancies-specific mortality
	Model 1a	1	1.28 (0.71 - 2.29)	1.16 (0.65 - 1.91)	0.69 (0.39 - 1.22)	0.91 (0.57 - 1.45)
	Model 2b	1	1.23 (0.64 - 2.38)	1.09 (0.62 - 1.94)	0.66 (0.36 - 1.19)	0.84 (0.53 - 1.36)
	Model 3c	1	1.16 (0.61 - 2.25)	1.02 (0.58 - 1.80)	0.63 (0.35 - 1.15)	0.86 (0.53 -1.38)
	Model 1: adjusted for age, race, gender and the length of follow-up by weighted COXPH model ; Model 2: further adjusted from model 1 for BMI, CCI, HEI, medication usage, HDL-C, LDL-C, TG and TC status by weighted COXPH ; Model 3: further adjusted from model 1 for BMI, CCI, HEI, medication usage, HDL-C, LDL-C, TG and TC status by weighted CRR model for cardiovascular/malignancies-specific mortalit…
